# Supplementary material for: MiR-99a alleviates apoptosis and extracellular matrix degradation in experimentally induced spine osteoarthritis by targeting FZD8
Source: PubMed Central journal article supplement (PMC9487131; doi:10.1186/s12891-022-05822-8), 2022-09-20
Supplement: 12891_2022_5822_MOESM1_ESM.pdf [file 12891_2022_5822_MOESM1_ESM.pdf]

# Figure 2 Blots

1 2 1 2 1 2

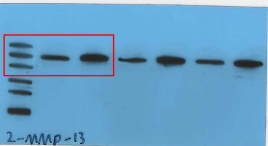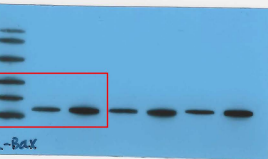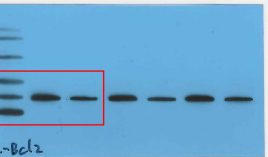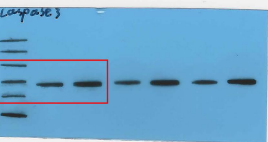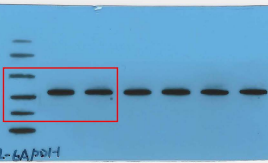

MMP-13

Bax

Bcl2

caspase3

GAPDH

1 2 1 2 1 2

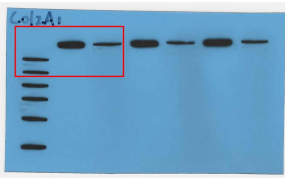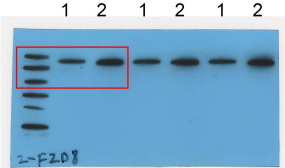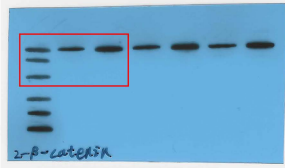

Col2A1

FZD8

β-catenin

1, Control  
2. IL-6/TNF-α

3 3 3 4 4 4

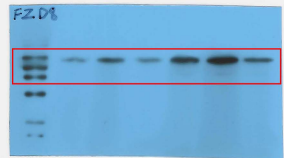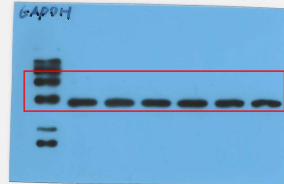

FZD8

GAPDH

3. Mild  
4. Severe

**Figure 3 Blots**

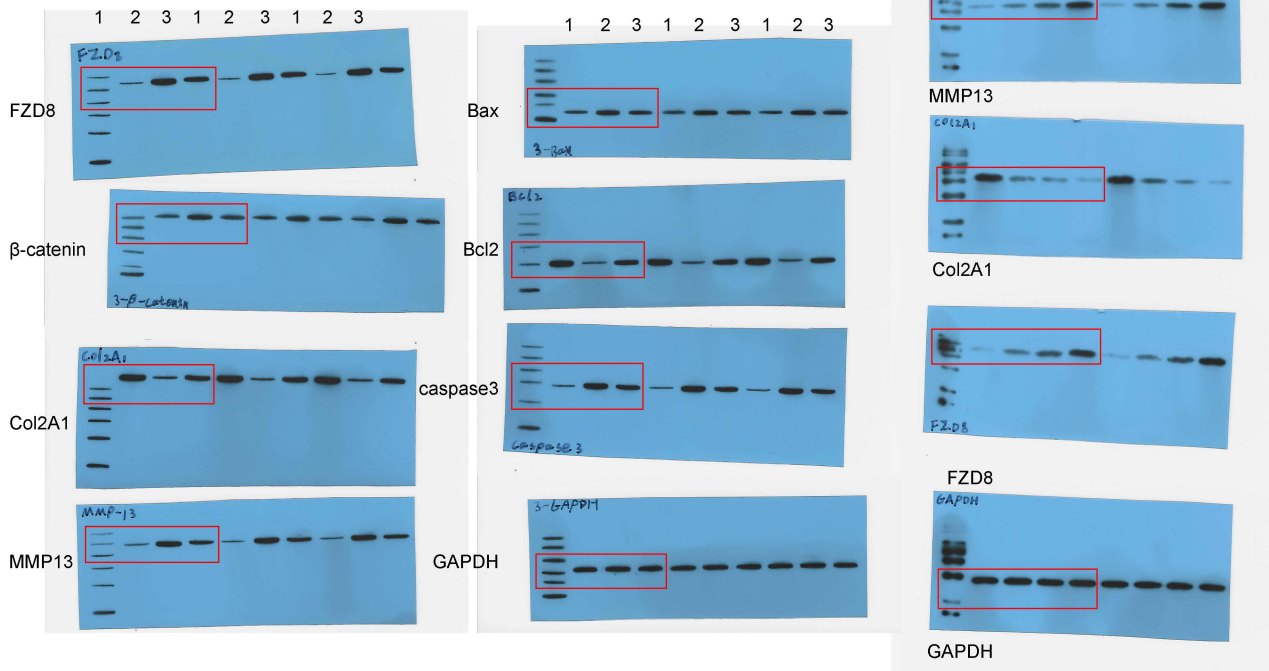

1. Control+Scramble
2. IL-6/TNF- $\alpha$ +Scramble
3. IL-6/TNF- $\alpha$ +miR-99a

4. Blank+NC
5. Blnak+antagomir
6. IL-6/TNF- $\alpha$ +NC
7. IL-6/TNF- $\alpha$ +antagomir

Figure 4 Blots

1 2 3 1 2 3 1 2 3

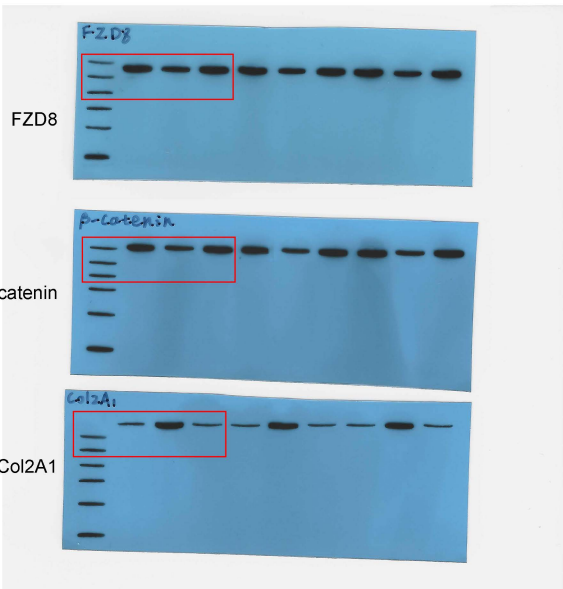

1. Vector
2. miR-99a
3. miR-99a+FZD8

1 2 3 1 2 3 1 2 3

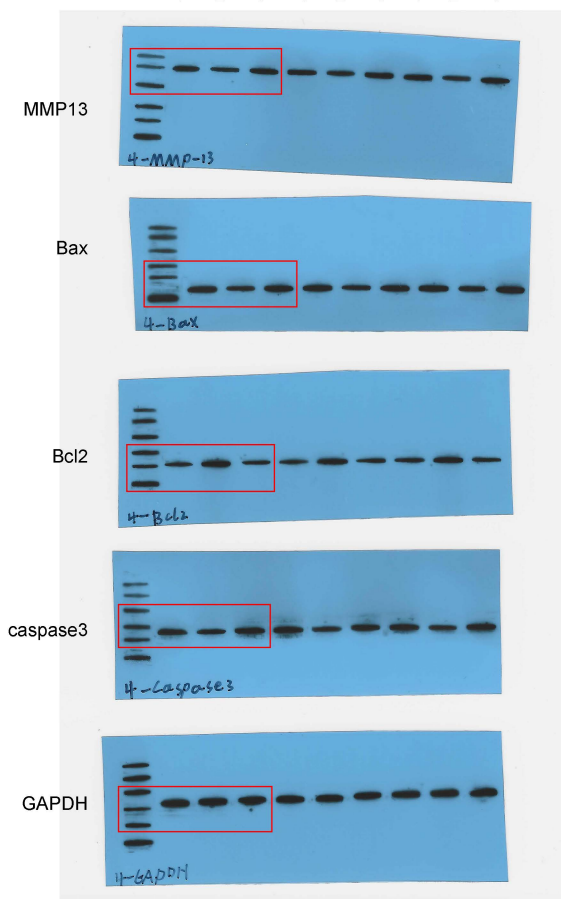

Figure 5 Blots

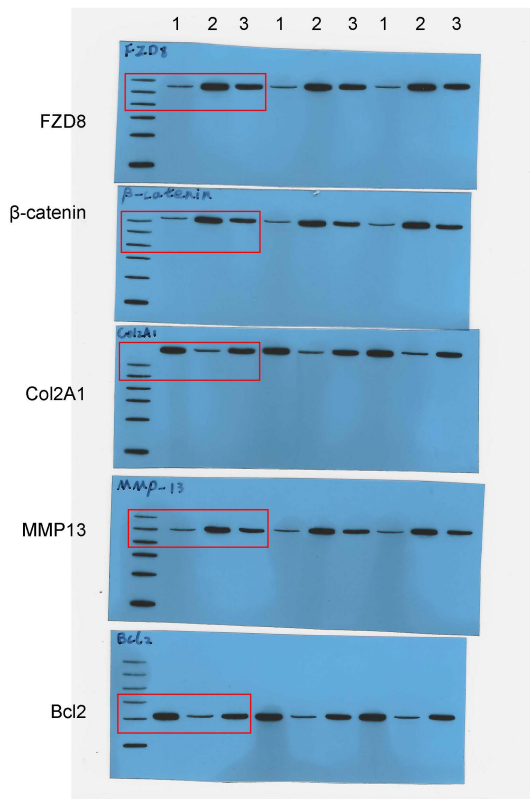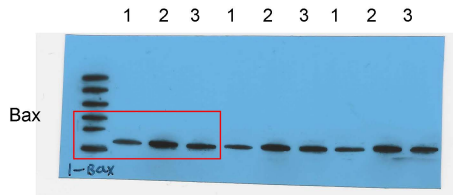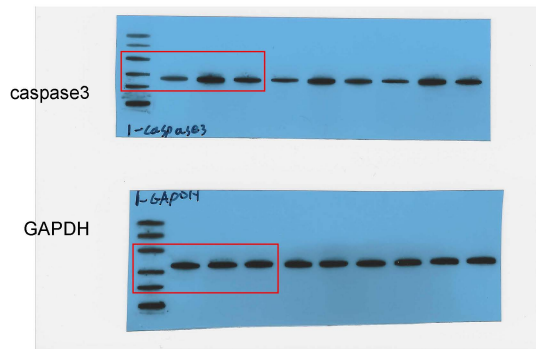

1. Sham
2. Model
3. Model+miR-99a
